# Supplementary material for: Novel, facile, and scalable synthesis of magnesium based adsorbents via the freeze-drying technique for CO2 capture
Source: Royal Society of Chemistry journal article supplement (doi:10.1039/d4se00802b), 2024-01-01
Supplement: d4se00802b1.pdf [file d4se00802b1.pdf]

## Supplementary Information

*for*

### Novel, Facile, and Scalable Synthesis of Magnesium Based Adsorbent via Freeze-Drying Technique for CO<sub>2</sub> Capture

Ashutosh Agarwal<sup>#</sup>, Hashan Nuwantha Thenuwara, Ping Wu<sup>\*</sup>

Entropic Interface Group, Engineering Product Development, Singapore University of Technology and Design, 8 Somapah Road, 487372, Singapore

<sup>#</sup>E-mail: ashutosh\_agarwal@sutd.edu.sg; <sup>#</sup>0000-0002-3007-1091

<sup>\*</sup>E-mail: wuping@sutd.edu.sg

**Fig. S1** Photograph of freeze-dried sample displaying white fluffy structure before calcination.

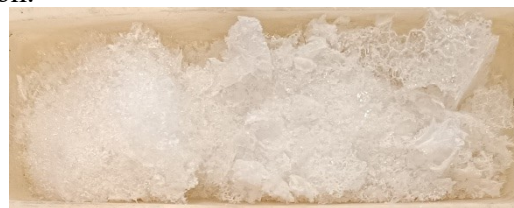

**Fig. S2** CO<sub>2</sub> adsorption/desorption cycle curves of FD adsorbent.

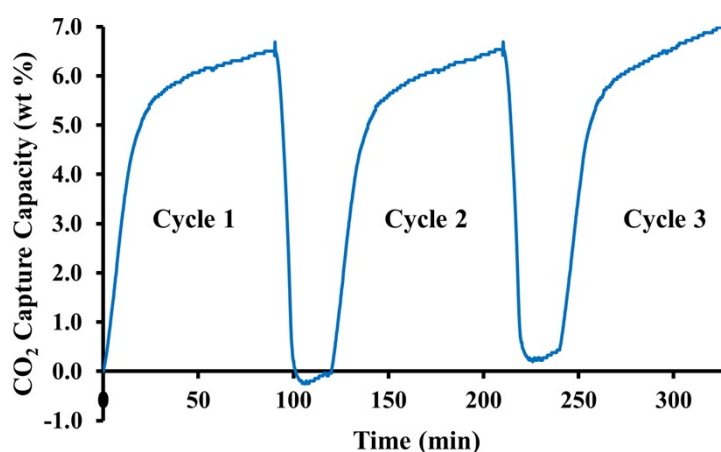

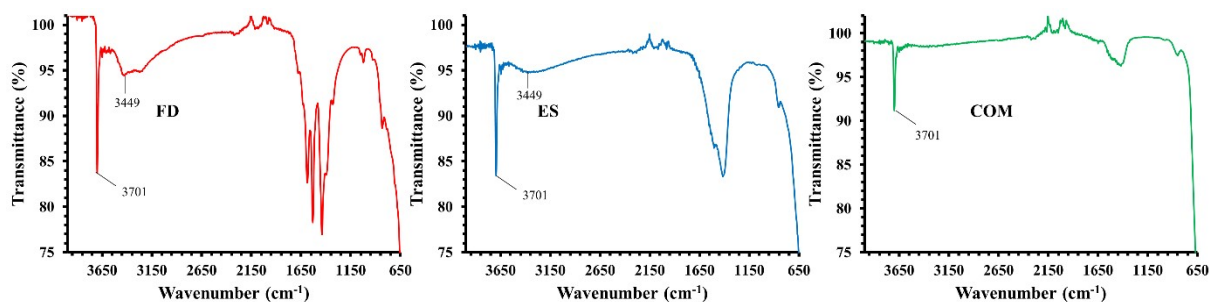

**Fig. S3** FTIR spectra of CO<sub>2</sub> adsorbed FD, ES, and COM sorbents within the 650 - 4000 cm<sup>-1</sup> wavelength range.

**Table T1** Comparison of the CO<sub>2</sub> capture capacity (mg/g) of different magnesium oxide/hydroxide-based materials at low adsorption temperatures ( $\leq 50$  °C).

| Materials                                         | Pretreatment desorption temperature (N <sub>2</sub> ) (°C) | CO <sub>2</sub> feed gas concentration (%) | CO <sub>2</sub> adsorption temperature (°C) | CO <sub>2</sub> capture capacity (mg/g) | Reference  |
|---------------------------------------------------|------------------------------------------------------------|--------------------------------------------|---------------------------------------------|-----------------------------------------|------------|
| 10% Cl <sup>-</sup> doped MgO/Mg(OH) <sub>2</sub> | 150                                                        | 99.9                                       | 30                                          | 45.9                                    | 31         |
| MgO/Mg(OH) <sub>2</sub> via ES                    | 150                                                        | 99.9                                       | 30                                          | 54.0                                    | This study |
| MgO/Mg(OH) <sub>2</sub> via FD                    | 150                                                        | 99.9                                       | 30                                          | 62.0                                    | This study |
| MgO–MH                                            | 400                                                        | 99.9                                       | 50                                          | 44.6                                    | 16         |
| MgO–BMC                                           | 400                                                        | 99.9                                       | 50                                          | 57.2                                    | 16         |
| MgO–MO                                            | 400                                                        | 99.9                                       | 50                                          | 60.8                                    | 16         |
| MgO400                                            | 400                                                        | 99.9                                       | 50                                          | 36.9                                    | 17         |
| Mesoporous MgO                                    | 800                                                        | 99.9                                       | 25                                          | 80.0                                    | 18         |
| MgO-BM2.5h                                        | 850                                                        | 99.9                                       | 25                                          | 70.9                                    | 28         |
